# Supplementary material for: Links of Adversity in Childhood With Mental and Physical Health Outcomes: A Systematic Review of Longitudinal Mediating and Moderating Mechanisms
Source: PubMed Central journal article supplement (PMC10240645; doi:10.1177/15248380221075087), 2022-02-28
Supplement: sj-pdf-1-tva-10.1177_15248380221075087.pdf [file sj-pdf-1-tva-10.1177_15248380221075087.pdf]

## Appendix A

### Search strategy

#### Scopus

(TITLE-ABS-KEY(child\* adversity\* OR “adverse childhood experienc\*” OR child\* trauma\* OR child\* maltreat\* OR child\* victimi\* OR child\* abus\* OR “cumulative risk”) AND TITLE-ABS-KEY(longitud\* OR prospect\* OR “cohort study”) AND TITLE-ABS-KEY(moderat\* OR mediat\* OR mechanism\* OR pathway OR indirec\* OR resilen\*))

Search screen: Advanced Search

#### Web of Science (Core Collection)

**TOPIC:** (child\* adversity\* OR "adverse childhood experienc\*" OR child\* trauma\* OR child\* maltreat\* OR child\* victimi\* OR child\* abus\* OR "cumulative risk")  
**AND TOPIC:** (longitude\* OR prospect\* OR "cohort study") **AND TOPIC:** (moderat\* OR mediat\* OR mechanism\* OR pathway OR indirec\* OR resilen\*)

Timespan: All years.

Databases: WOS.

Search language=English

#### Medline via Ovid

- 1 adverse childhood experience.mp. or exp Adverse Childhood Experiences/
- 2 child abuse.mp. or exp Child Abuse/
- 3 childhood trauma.mp.
- 4 child maltreatment.mp.
- 5 child victimisation.mp.
- 6 cumulative risk.mp.
- 7 exp Longitudinal Studies/ or longitudinal.mp.
- 8 prospective study.mp. or exp Prospective Studies/
- 9 cohort study.mp. or exp Cohort Studies/

- 10 moderation.mp.
- 11 mediation.mp.
- 12 mechanism.mp.
- 13 pathway.mp.
- 14 indirect.mp.
- 15 Resilience, Psychological/ or resilience.mp.
- 16 1 or 2 or 3 or 4 or 5 or 6
- 17 7 or 8 or 9
- 18 10 or 11 or 12 or 13 or 14 or 15
- 19 16 and 17 and 18

**PsycINFO via Ovid**

- 1 exp Childhood Adversity/ or exp Adversity/ or exp Child Abuse/ or child adversity.mp.
- 2 adverse childhood experiences.mp.
- 3 childhood trauma.mp.
- 4 exp Sexual Abuse/ or exp Victimization/ or childhood maltreatment.mp. or exp Child Neglect/
- 5 childhood victimisation.mp.
- 6 cumulative risk.mp.
- 7 exp Longitudinal Studies/ or longitudinal.mp.
- 8 exp Prospective Studies/ or prospective.mp.
- 9 cohort study.mp.
- 10 exp Mediation/ or moderation.mp.
- 11 mechanism.mp.
- 12 pathway.mp.

- 13 indirect.mp.
- 14 exp "Resilience (Psychological)"/ or resilience.mp.
- 15 1 or 2 or 3 or 4 or 5 or 6
- 16 7 or 8 or 9
- 17 10 or 11 or 12 or 13 or 14
- 18 15 and 16 and 17
